# Supplementary material for: Structural asymmetry in the Thermus thermophilus RuvC dimer suggests a basis for sequential strand cleavages during Holliday junction resolution
Source: PubMed Central journal article supplement — Nucleic Acids Res. 2012 Oct 31;41(1):648–56. doi: 10.1093/nar/gks1015 (PMC3592405; doi:10.1093/nar/gks1015), 2012-10-31
Supplement: supp_gks1015_nar-01410-2012-File009.pdf [file supp_gks1015_nar-01410-2012-File009.pdf]

## Supplementary Figures 1 - 8

Structural asymmetry in the *Thermus thermophilus* RuvC dimer suggests a basis for sequential strand cleavages during Holliday junction resolution.

Luan Chen, Ke Shi, Zhiqi Yin, Hideki Aihara

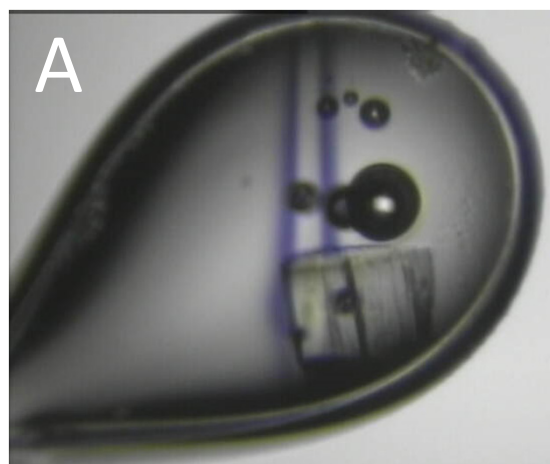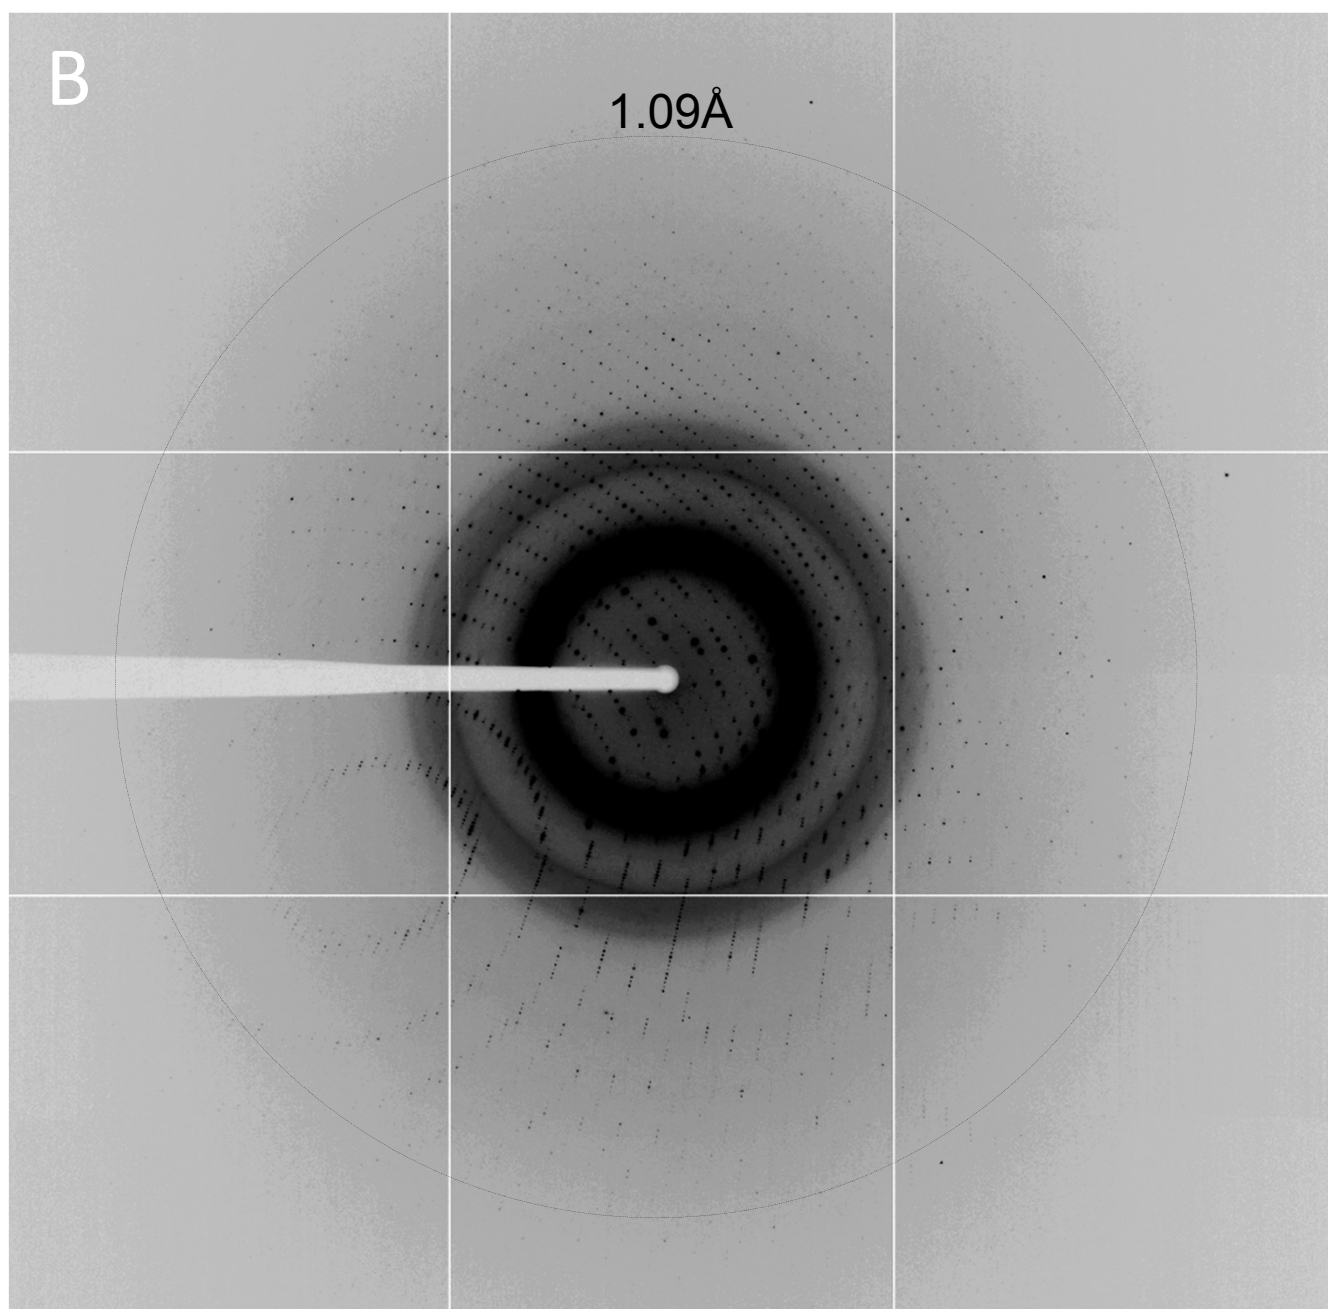

**Supplementary Fig. 1** (previous page) | **X-ray diffraction by the *T.th.* RuvC crystal**

**(A)** Picture of a frozen *T.th.* RuvC crystal (form I) mounted in a nylon loop, taken after a brief x-ray exposure. The vertical streak line penetrating through the loop marks the path of the x-ray beam. **(B)** An x-ray diffraction image from the crystal shown in (A). The dotted circle corresponds to a Bragg spacing of 1.09Å. The diffraction image was collected at the beamline 24-ID-C of the Advanced Photon Source.

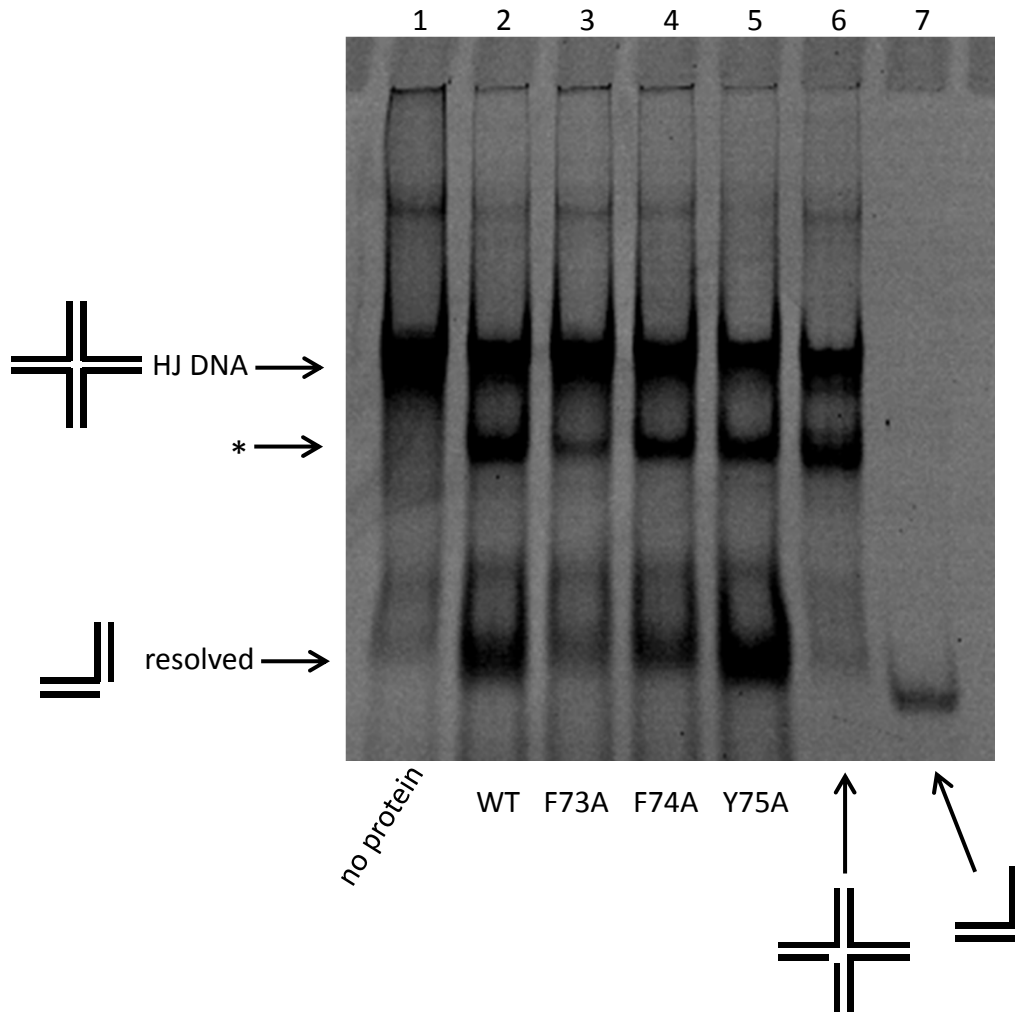

**Supplementary Fig. 2 | HJ-DNA resolution by *T.th.* RuvC analyzed on a native gel**

The HJ-DNA substrate was incubated with the wild-type or mutant forms of *T.th.* RuvC, and the products were analyzed on a non-denaturing polyacrylamide gel. The right most lane (lane 7) has the expected resolved product assembled from three oligonucleotides that would be generated as a result of symmetrical strand cleavages at the positions indicated by arrows in Figure 1B. The intermediate band (\*) is presumed to be generated as a result of single-strand nicking, as a band of the same mobility is present in the pre-nicked HJ-DNA substrate prepared by mixing 5 oligonucleotides (lane 6).

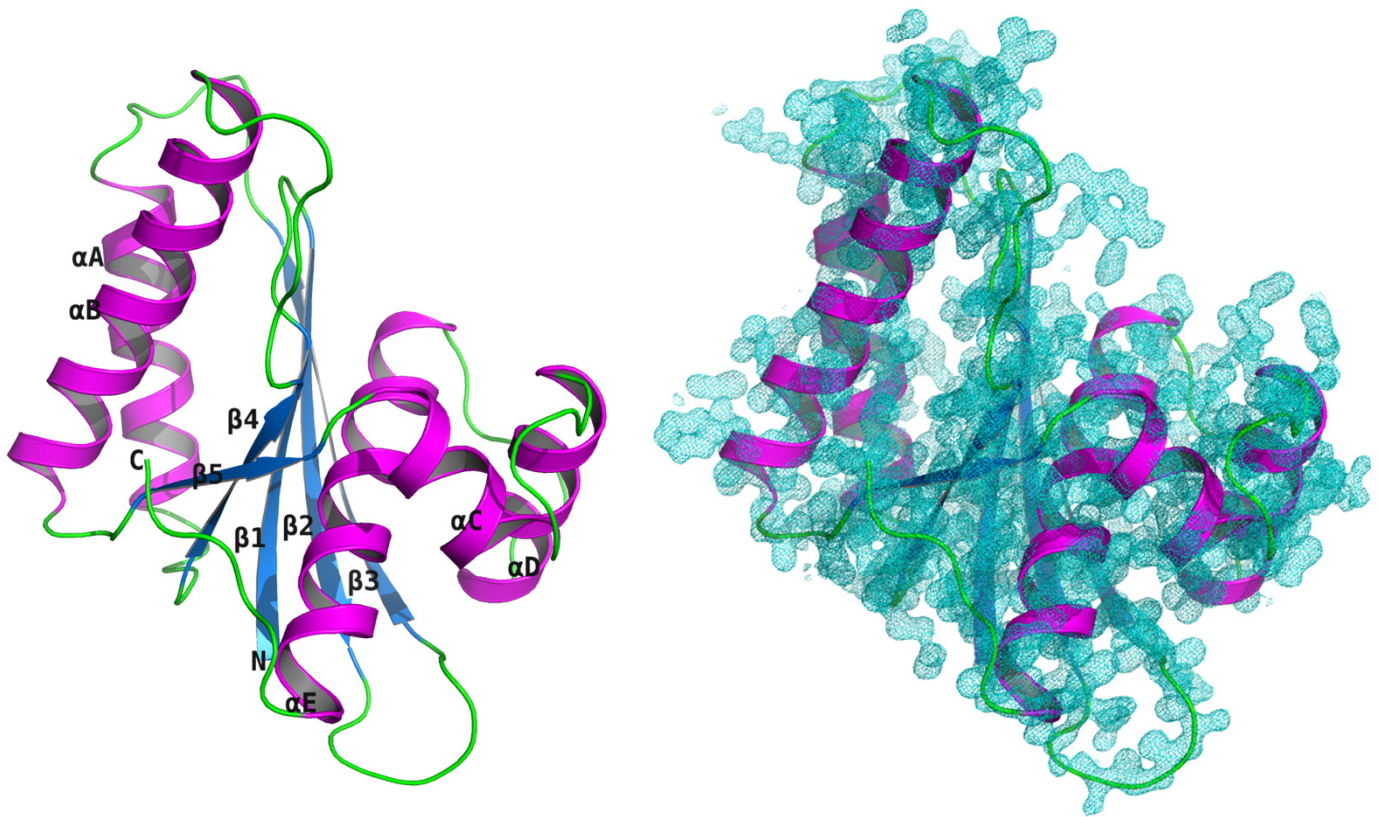

**Supplementary Fig. 3 | Electron density map for *T.th.* RuvC**

Ribbon drawing for a monomer of *T.th.* RuvC in the higher resolution  $P2_12_12_1$  crystal form (form I), with the secondary structure elements labeled (left, same as Fig. 2A) or the  $\sigma_A$  weighted  $2F_o-F_c$  electron density map contoured at  $1.2\sigma$  superimposed (right).

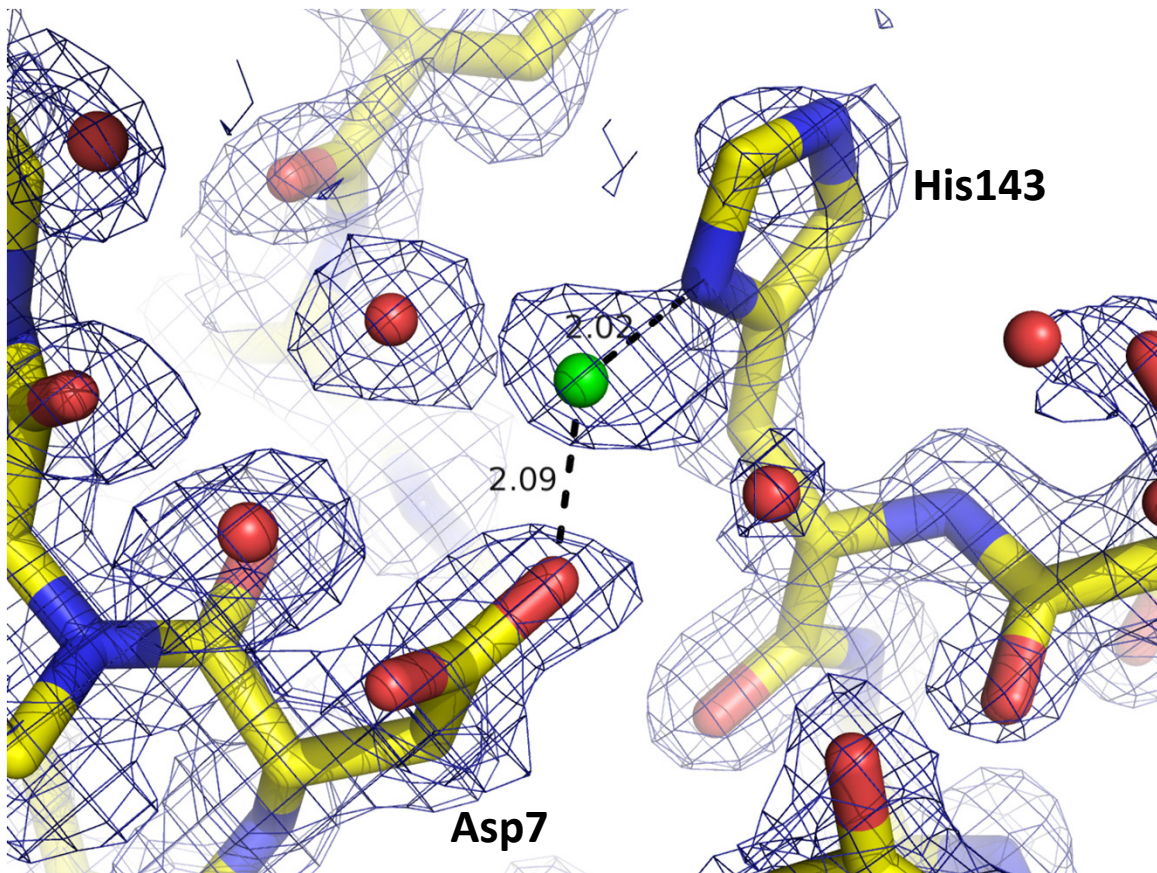

**Supplementary Fig. 4 | His143 in the active site of *T.th.* RuvC.**

A subset of RuvC orthologs including *T.th.* RuvC have His at this position instead of Asp as in *E. coli* RuvC. The catalytic residues His143 and Asp7 coordinate a metal ion (green sphere), putatively assigned as  $Mg^{2+}$  or  $Na^{+}$  based on the coordination distances. Simulated annealed composite omit 2Fo-Fc electron density is shown by blue meshes at a  $1.0\sigma$  contour level. The red spheres represent water molecules.

```

RUVC_CALS8      -----MRVLGIDPGIALTGYGIIIESKN--GSEFKVIDYGRIFETSSSLKKSMLRLHLYT 51
RUVC_THEMA      ----MGSRLRILGVDPGYGIVGIGIIEVS---GNRISHVFGHTIETPKNLPAEKRLKRIYE 53
RUVC_THEEB      -----MRILGLDPGLATLGYGCIIEVY---RDTCQVRDFGVIITTSADLPTGDRLQSLYN 50
RUVC_HELPY      -----MRILGIDPGRKCGYAIISHASN-KLSLITAGFINITTR---LQEQILDIE 49
D3P8S6_DEFDS    -----MIIFGIDPGLNKTGVVLELADN-NNSFRCDVYTVLKNKSSLSTIDKIAEITD 52
RUVC_THET8      -----MNVAGIDDPGITHLGLGVVAVEGKGALKARLLHGEVVKTSQPQPAKERVGRiha 53
RUVC_THEAQ      -----MIVLGVDPGITHLGLGVVAAEEKGALKARLLHGEVVR TSHKEKAEARVGRiha 53
D7BFJ8_MEISD    -----MIVLGIDDPGITNMGLGVVEQSGK---AHRLHARLVKTAHSDPAPQRVGEIFQ 50
D3PTI4_MEIRD    -----MIVLGIDDPGITNLGIGVVEQAGK---QTRMLHAEVVKTTTHGETAPERVVKLYR 50
RUVC_DEIRA      -----MRVLGIDPGLANLGLGLVEGDVR--RAKHLHVCLT-TEAWLMPRRLQYLHE 50
RUVC_DEIGD      -----MIVLGVDPGLANLGLGLVEGDVR--KARHLHVCLT-TEAWLMPRRLQYLHE 50
C1CYQ3_DEIDV    ---MLSDMIVLGDPLANLGLGLVGDGDIR--KARHLHVCLT-TEAWLMPRRLQYIHE 54
D7CUV7_TRURR    MNRTRPPLTVVGLDPGLANLGLGAVR-EVG--RAVTLGAKLVR TSPSAEQSARLETLYR 57
RUVC_MYCTU      -----MRVMGVDPGLTRCGLSLIESGRG--RQLTALDVDVVRTPSDAALQRLLAISD 51
RUVC_ECOLI      -----MAIILGIDPGRSVTGYGVRQVGR--QLSYLGSIGCIRTKVD-DLPSRLKLIYA 50
RUVC_HYDTT      -----MSRIMTIDPGYSALGYAVGEEN-----KLIEYGTVYFKGK--EETRLTEIYL 45
      :      :***      *      :      :

```

```

RUVC_CALS8      ELCSIISLYQPDVVAIEELFFSKN-SKTAITIGEARGVIIITC IQNNLSIYEYTPLOVKQ 110
RUVC_THEMA      EFLKVLERFSPDECAMEKLLFFVKV-VTTAIGVGEARGVFLALAEKNIPVFEYAPNEVKV 112
RUVC_THEEB      DLHTLIPILQPDVLAERLFFYR--MSHTIGVAQARGVILLVLSQRHCPLLELTPPQVKQ 108
RUVC_HELPY      ALDCLLDRYEVNEVAIEDIFFGYN-PKSVIKLAQFRGALSILKILERIGNFSEYTPLOVKK 108
D3P8S6_DEFDS    SLKSYVKRYSPLYAAVVEESFYSVN-VKTAISLGMARGAIISTLLSHSVKVFQFTALQIKK 111
RUVC_THET8      RVLVHLHRFRPEAVAVEEQFFYRQ-NELAYKVGWALGAVLVAAFEAGVPVYAYGPMQVKQ 112
RUVC_THEAQ      RAKEALLAFRPEALAVEEQFFYRQ-NELAYKVGWALGAVLVAAFEAGVPVYAYGPMQVKQ 112
D7BFJ8_MEISD    NLRIVIAEFRPQAIAVEEQFFYRQ-NELSYKVGWAMGAVFIAANEWGLEVYGYGPMKVKQ 109
D3PTI4_MEIRD    AVYQVAAAYRPQAIAVEEQFFYRQ-NELAYKVGWAMGAVFLVADQLEIPVYGYGPPKVKQ 109
RUVC_DEIRA      ELTRLLTEYRPDAVAIEDQILRRQ-ADVAFKVGQAFGVVQLACAQAGVPIHAYGPMQVKK 109
RUVC_DEIGD      EVARLLAEYRPDAVAIEDQILRRQ-ADVAFKVGQAFGVVQLACAQAGVPIHAYGPMQVKR 109
C1CYQ3_DEIDV    EVTRLLAEYQPEVAIEDQILRRQ-ADVAFKVGQAFGVVQLACAQAGVPIHAYGPMQVKK 113
D7CUV7_TRURR    EVSRFFALYEPDLALEEQYFHRQ-REVAFKVGQACGVCLLAAQEHGLEVVEYGPMPQVKQ 116
RUVC_MYCTU      AVEHWDTHHPVVAIERVFSQLN-VTTVMGTAQAGGVIALAAAKRGVDVHFHTPSVEKA 110
RUVC_ECOLI      GVTETIITQFPDYFAIEQVFMKN-ADSALKLQARGVAIVAAVNQELPVFEYAAARQVKQ 109
RUVC_HYDTT      KIKELIQRHNPDTVLIEDYRVYKDYGKGHKTAIVVGIICAIAYEHKIKPTFVVFHNSWKA 105
      :      *      *      *

```

```

RUVC_CALS8      SITGYGRADKTQIQKMKVSLGLSEIPKPDVDALAVAMCHILSSSS--VLYQEDEV-- 166
RUVC_THEMA      SLSGYGRASKKQIQENVKRFNLNSEIPRPDDAADALAIWCHALQSRARRVTHEKD---- 168
RUVC_THEEB      ALTGYGNATKIEVQRAVQRELHLCTLPQPDDAADALAIALT---ASRH--CGHING---- 159
RUVC_HELPY      ALTGNKAAKEQVAFMVKRLNITSEIKPLDISDAIAVAITHAQRKLH----- 157
D3P8S6_DEFDS    SVVGYGKADKNQVKKMVMQNLNLSLNDVLDVSDALACGICLAIFLKGLYDKLY----- 166
RUVC_THET8      ALAGHGHAAKEEVALMVRGILGLKEAPRPSHLADALAIALTHAFYARMGTAKPL----- 166
RUVC_THEAQ      ALAGHGHASKEEVALMVRGILGLKEAPRPSHLADALAIALTHAFYARLGAAPL----- 166
D7BFJ8_MEISD    ALVGYGHAKEQVAFMVRALLGLKENPKPTHVADALAIALTHLFYLRGGGNRI----- 163
D3PTI4_MEIRD    ALVGTGQADKHQVAYMVRALLGLKSLPKPTHADALAIALTHCFYQPLAPGPVS----- 164
RUVC_DEIRA      SLVGTGRADKEQVIYMVKASLGIRELFN-NHAADALALALTHLAHAPMQRSERLAAAGR 168
RUVC_DEIGD      SLVGTGRADKEQVIYMVKATLGIREFLN-NHAADALALALTHLAHQPMRAASTRLAQKSA 168
C1CYQ3_DEIDV    ALVGTGRADKEQVIYMVKASLGVREFLN-NHAADALALALTHLAHQPMQAAA-RLARA-- 169
D7CUV7_TRURR    ALVGTGRASKAQVGYMVRATLGLKETPESHVADALALALTHLSARQFQLLR----- 168
RUVC_MYCTU      AVTGNGSADKAQVTAMVTKILALQAKPTPADAADALAIACHCWRAPTIARMAEATSRAE 170
RUVC_ECOLI      TVVIGISAESQVQHMRVTLKLPANPQ-ADAADALAIATHCHVSNAMQMSERLNLNA 168
RUVC_HYDTT      KFQRVYFTIVNRLSEEWKALGE-----GSEHSRDVMMLLPEVVSLLKALLKGG----- 154
      :      :      *      *      :

```

```

RUVC_CALS8      -----
RUVC_THEMA      -----
RUVC_THEEB      -----
RUVC_HELPY      -----
D3P8S6_DEFDS    -----
RUVC_THET8      -----
RUVC_THEAQ      -----
D7BFJ8_MEISD    -----
D3PTI4_MEIRD    -----
RUVC_DEIRA      AARTGDAPLRR----- 179
RUVC_DEIGD      -----
C1CYQ3_DEIDV    -----
D7CUV7_TRURR    -----
RUVC_MYCTU      ARAAQQRHAYLAKLKAAR 188
RUVC_ECOLI      RGRLR----- 173
RUVC_HYDTT      -----

```

**Supplementary Fig. 5 (previous page) | Sequence alignment of RuvC orthologs.**

The highly conserved catalytic residues are highlighted by yellow boxes. The aromatic residues in the asymmetric loop region of *T.th.* RuvC (Phe73, Phe74, and Tyr75), and Phe69 of *E. coli* RuvC that had been shown to be essential for DNA strand cleavage, are highlighted by grey boxes.

RuvC orthologs from the following species were aligned.

RUVC\_CALS8: *Caldicellulosiruptor saccharolyticus*

RUVC\_THEMA: *Thermotoga maritima*

RUVC\_THEEB: *Thermosynechococcus elongatus*

RUVC\_HELPY: *Helicobacter pylori*

D3P8S6\_DEFDS: *Deferribacter desulfuricans*

**RUVC\_THET8**: *Thermus thermophilus*

RUVC\_THEAQ: *Thermus aquaticus*

D7BFJ8\_MEISD: *Meiothermus silvanus*

D3PTI4\_MEIRD: *Meiothermus ruber*

RUVC\_DEIRA: *Deinococcus radiodurans*

RUVC\_DEIGD: *Deinococcus geothermalis*

C1CYQ3\_DEIDV: *Deinococcus deserti*

D7CUV7\_TRURR: *Truepera radiovictrix*

RUVC\_MYCTU: *Mycobacterium tuberculosis*

**RUVC\_ECOLI** : *Escherichia coli*

RUVC\_HYDTT: *Hydrogenobacter thermophilus*



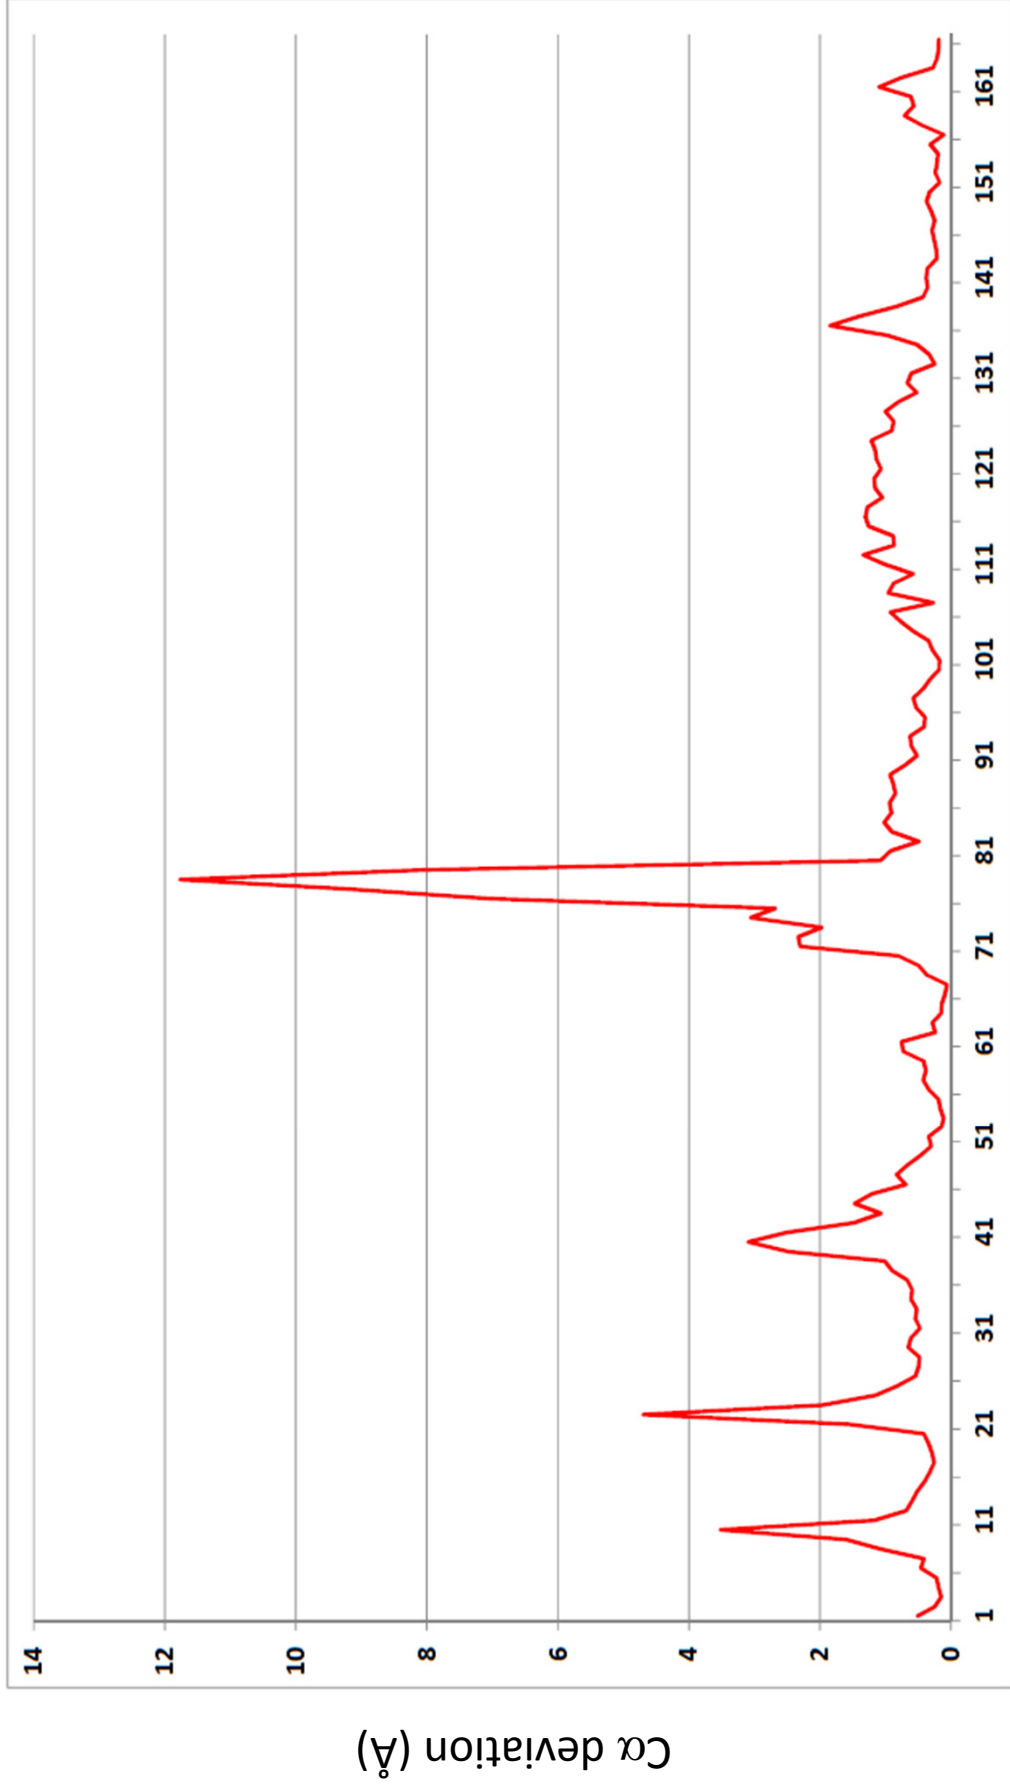

Residue number

**Supplementary Fig. 6 (previous page) | Structural differences between the two RuvC molecules within the *T.th.* RuvC dimer.**

The two *T.th.* RuvC molecules in the higher resolution P2<sub>1</sub>2<sub>1</sub>2<sub>1</sub> crystal form (form I) were superimposed, and the deviation of the C $\alpha$  atom positions was plotted as a function of residue number. The overall rmsd is 0.97Å.

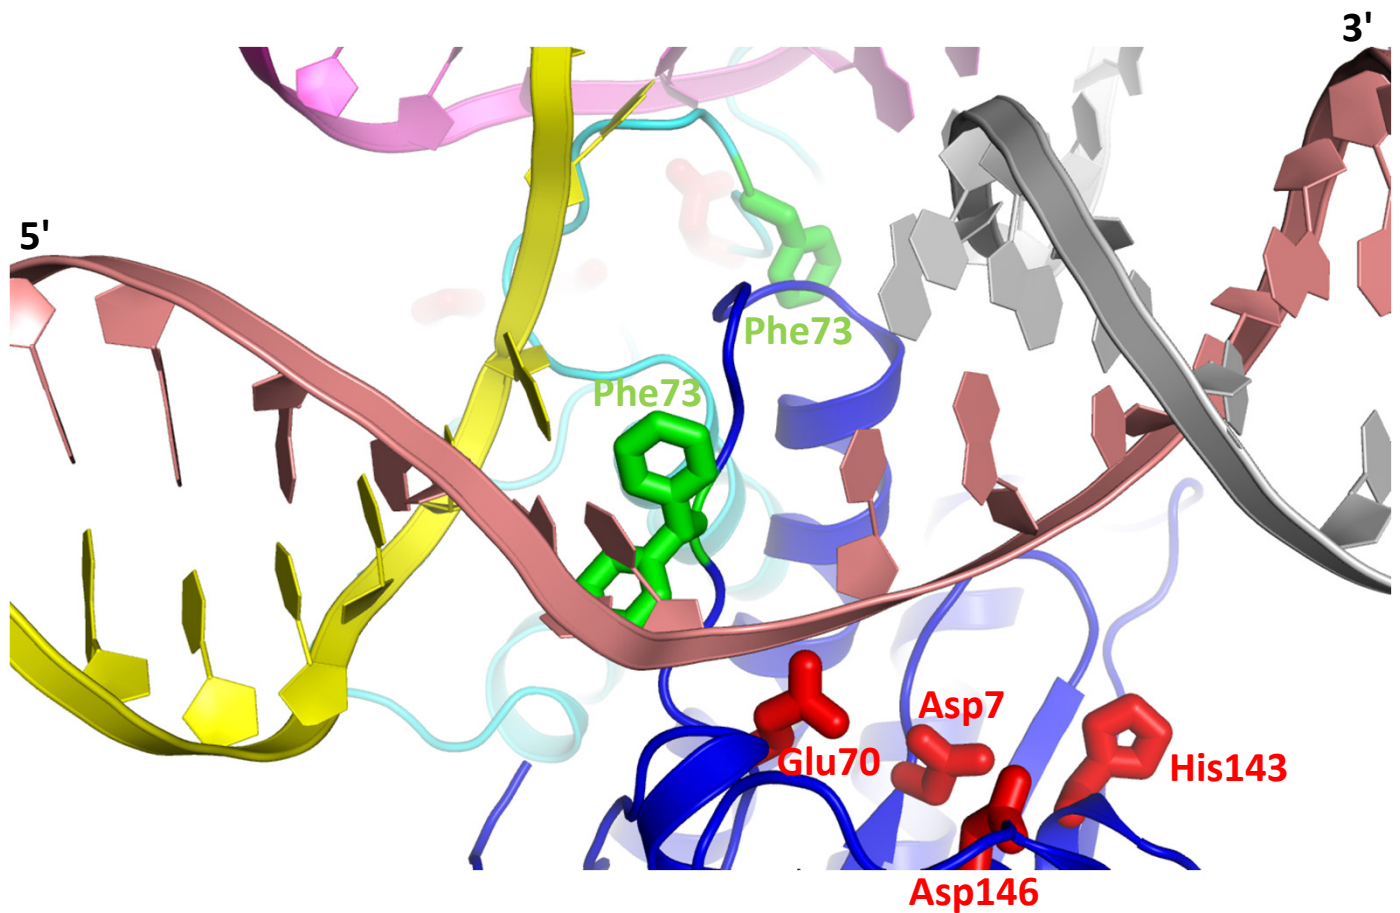

**Supplementary Fig. 7 | A close-up view around the junction point of the hypothetical *T.th.* RuvC-HJ model**

The view and the color scheme are same as those in Figure 4B. Both the major and minor conformers of the Phe73 sidechain are shown for one of the protein molecules (green sticks). The asymmetric loops penetrate the central opening of HJ.

Note that the model is purely hypothetical, and therefore unlikely to be accurate in all aspects. For instance, the loop in one conformation (cyan) has a steric clash with a DNA nucleobase, implying that the DNA (and/or protein) conformation needs to be different in the real *T.th.* RuvC-HJ complex.

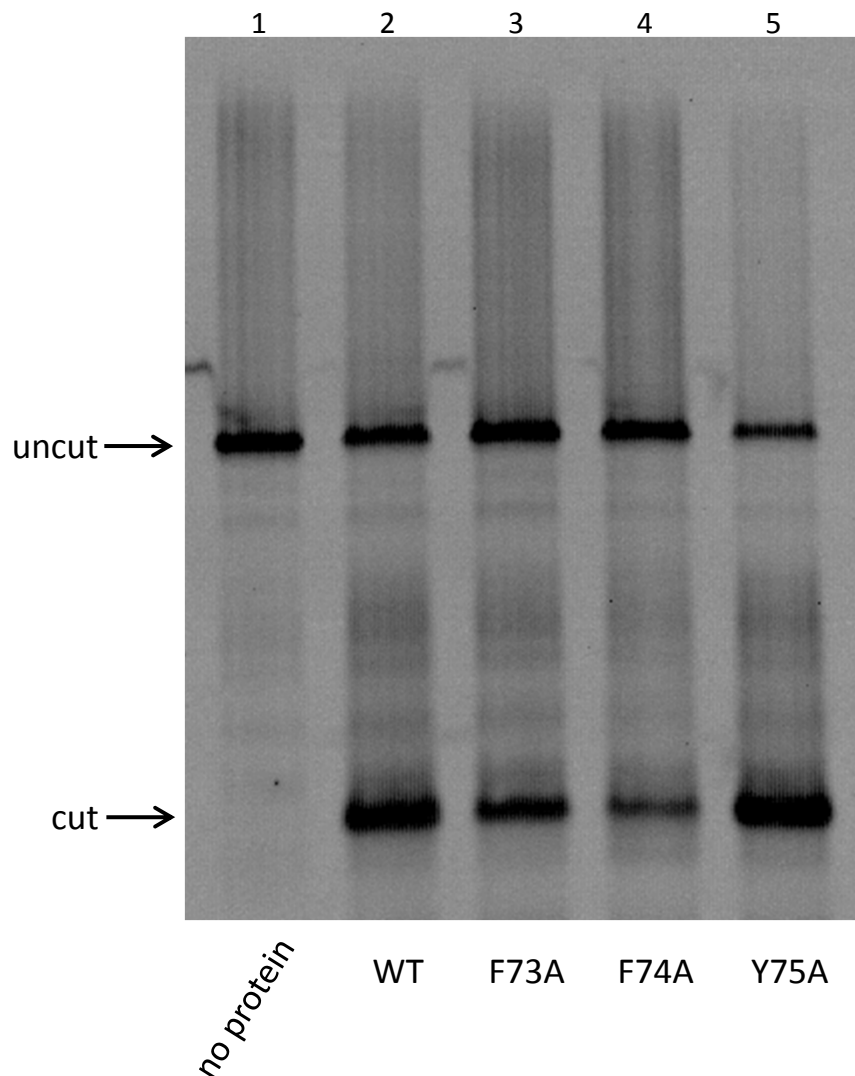

**Supplementary Fig. 8 | Cleavage on the pre-nicked HJ substrate by *T.th.* RuvC and its mutants**

The pre-nicked HJ substrate with the 5'-phosphate group at the nick (same as that used in Fig. 1C, lane 3) was incubated with the wild-type or mutant forms of *T.th.* RuvC and the products were analyzed on a denaturing polyacrylamide gel as in Fig. 6A.

In contrast to the cleavage on the intact (unnicked) HJ-DNA, the major cutting site by the F74A mutant is same as that by the wild-type enzyme.
